# Supplementary material for: Use of Latent Class Analysis and k-Means Clustering to Identify Complex Patient Profiles
Source: PubMed Central journal article supplement (PMC7733156; doi:10.1001/jamanetworkopen.2020.29068), 2020-12-11
Supplement: jamanetwopen-e2029068-s001.pdf [file jamanetwopen-e2029068-s001.pdf]

## Supplemental Online Content

Grant RW, McCloskey J, Hatfield M, et al. Use of latent class analysis and k-means clustering to identify complex patient profiles. *JAMA Netw Open*. 2020;3(12):e2029068. doi:10.1001/jamanetworkopen.2020.29068

**eTable 1.** Data Description and Variable Extraction Strategy by Health Information Domain

**eTable 2.** Overall Observed Prevalence and Predicted Prevalence of Variable Endorsement Across Classes

**eTable 3.** Relative Risk for 1-year Outcomes by Complex Patient Profile, LCA Clusters

**eTable 4.** Relative Risk for 1-year Outcomes by Complex Patient Profile, K-means clusters

This supplemental material has been provided by the authors to give readers additional information about their work.

## MOMO Feature Extraction Summary

**eTable 1. Data Description and Variable Extraction Strategy by Health Information Domain**

All model variables were generated from extensive electronic data residing in multiple data systems within our electronic health record. Our aim was to create variables that represented the breadth of health information domains consistently available for all patients treated by the health system. Each data domain had a unique structure and relationship between data entries or records. As such, the extraction strategy was adapted to suit the properties of each domain. For all domains, we extracted patient data for one year prior to the index date of July 15, 2018. This Table provides detail to the variable creation process used for clustering listed in eTable 2.

| Domain                          | Data Sources and Properties                                                                                                                                                                                                                                                               | Variable Extraction Strategy                                                                                                                                                      |
|---------------------------------|-------------------------------------------------------------------------------------------------------------------------------------------------------------------------------------------------------------------------------------------------------------------------------------------|-----------------------------------------------------------------------------------------------------------------------------------------------------------------------------------|
| Communications                  | Phone calls documented by clinicians and staff; registration/log-in information and email messages captured from the online patient portal                                                                                                                                                | Restricted to messages with patient's PCP and incoming calls that were not automated (e.g. excluded pacemaker initiated); grouped by patient initiation to create count variables |
| Disease Registries              | End-stage renal disease captured from population health management tool updated monthly                                                                                                                                                                                                   | Latest entry used                                                                                                                                                                 |
| Durable Medical Equipment (DME) | All DME orders with numeric codes grouped by equipment type                                                                                                                                                                                                                               | Clinically guided grouping and selection of relevant DME based on code description                                                                                                |
| Health Behaviors/ Depression    | Patient responses to questionnaires administered and vital signs collected during clinical encounters                                                                                                                                                                                     | Latest entry used                                                                                                                                                                 |
| Lab Results                     | Lab results flagged as abnormal within electronic systems                                                                                                                                                                                                                                 | Clinically guided selection and grouping of relevant labs to create indicator variables                                                                                           |
| Medications                     | All filled prescriptions, each linked to a Generic Product Identifier (GPI) hierarchical classification system code                                                                                                                                                                       | Grouped by the first four characters of GPI code; indicator variables created for each medication type                                                                            |
| Membership                      | Health plan administrative data related to coverage periods and plan type                                                                                                                                                                                                                 | Membership records merged to define continuous membership periods; indicator variables created for each membership type                                                           |
| Procedures                      | All procedures captured in electronic health record and claims systems.                                                                                                                                                                                                                   | Clinically guided grouping using procedure code taxonomy and code description; indicator variables created for each procedure group                                               |
| Sociodemographics               | Emergency contact information and need for an interpreter data were available in real-time from the electronic health record; Neighborhood Deprivation Index Score calculated from 2016 American Community Survey data by census tract and linked via geocoded patient addresses; medical | Latest entry used except for medical financial assistance (indicator variable created for any financial assistance application or coverage in the prior year)                     |

|             |                                                                                                                                                                                                                                                                                                           |                                                                                                                                                                                                                                                                                                                                                                 |
|-------------|-----------------------------------------------------------------------------------------------------------------------------------------------------------------------------------------------------------------------------------------------------------------------------------------------------------|-----------------------------------------------------------------------------------------------------------------------------------------------------------------------------------------------------------------------------------------------------------------------------------------------------------------------------------------------------------------|
|             | financial assistance data stored by unique application and coverage period.                                                                                                                                                                                                                               |                                                                                                                                                                                                                                                                                                                                                                 |
| Utilization | All patient visits and facility admissions captured in the electronic health record and claims systems; each encounter had an associated a type and subtype, generated primarily from location of service; PCP assignment data from an administrative source linked to visits using a unique provider ID. | Grouped primarily by encounter type with subgrouping by department, provider specialty and provider type when greater specificity was needed; count variables created for each clinically selected utilization group; visit no shows grouped by chemical dependency/psychiatry department or not, due to higher frequency (weekly) of behavioral health visits. |

**eTable 2. Overall Observed Prevalence and Predicted Prevalence of Variable Endorsement Across Classes**

Variables are sorted by class count (descending greater or equal to 55% then ascending less than or equal to 10%) then descending observed prevalence. Box colors indicate variable prevalence category. Variables boxed in **bold** had the largest variation in prevalence across classes.

|                                                          | Overall Observed Prevalence | Class count |       | Highest Acuity | Older w CVD   | Frail Elderly | Chronic Pain  | Active Cancer | Psych Illness | Less Engaged  |
|----------------------------------------------------------|-----------------------------|-------------|-------|----------------|---------------|---------------|---------------|---------------|---------------|---------------|
|                                                          |                             | ≥ 55%       | ≤ 10% |                |               |               |               |               |               |               |
| <b>Number of patients</b>                                | <b>104,869</b>              |             |       | <b>10,360</b>  | <b>17,524</b> | <b>13,786</b> | <b>13,557</b> | <b>7,967</b>  | <b>12,545</b> | <b>29,130</b> |
|                                                          | %                           |             |       | %              | %             | %             | %             | %             | %             | %             |
| Tobacco use: Any use in lifetime                         | 53.2                        | 4           | 0     | 59.0           | 57.9          | 49.0          | 55.2          | 46.5          | 55.4          | 50.3          |
| <b>Medication: Opioid Agonists</b>                       | 51.5                        | 4           | 0     | 76.8           | 39.4          | 41.4          | 81.1          | 70.6          | 56.2          | 33.5          |
| Exercise: 0 minutes per week                             | 57.1                        | 3           | 0     | 69.0           | 59.9          | 71.6          | 54.8          | 42.7          | 50.8          | 52.0          |
| <b>Utilization: 1+ Hospital admission</b>                | 41.1                        | 3           | 1     | 93.3           | 45.9          | 75.3          | 28.1          | 55.4          | 32.5          | 9.5           |
| <b>Medication: Antidepressants</b>                       | 37.9                        | 2           | 0     | 55.6           | 19.9          | 38.5          | 52.2          | 28.5          | 76.6          | 21.4          |
| <b>Labs: Stage 3-4 kidney disease</b>                    | 35.4                        | 2           | 0     | 55.2           | 56.0          | 47.8          | 24.2          | 32.3          | 17.6          | 23.9          |
| <b>Medication: Diuretics - Loop</b>                      | 31.8                        | 2           | 0     | 66.7           | 73.2          | 28.7          | 17.6          | 16.8          | 12.9          | 14.9          |
| <b>Utilization: 7+ Outpatient departments visited</b>    | 28.3                        | 2           | 1     | 63.7           | 24.9          | 10.7          | 57.7          | 44.5          | 37.7          | 3.8           |
| <b>Utilization: 1+ Home health visit</b>                 | 25.6                        | 2           | 2     | 74.5           | 17.0          | 76.7          | 17.7          | 16.1          | 8.9           | 2.8           |
| <b>Labs: BNP– high</b>                                   | 25.1                        | 2           | 4     | 68.1           | 61.9          | 34.3          | 7.0           | 9.3           | 6.1           | 4.2           |
| <b>Medication: Anticonvulsants - Not Benzodiazepines</b> | 28.7                        | 1           | 0     | 48.5           | 15.5          | 23.8          | 46.0          | 22.6          | 55.2          | 14.2          |
| <b>Labs: liver enzymes – high</b>                        | 26.5                        | 1           | 0     | 53.8           | 22.7          | 28.3          | 15.4          | 62.1          | 28.2          | 13.0          |
| <b>Medication: Glucocorticoids</b>                       | 25.7                        | 1           | 0     | 39.0           | 24.9          | 12.2          | 38.0          | 55.2          | 24.0          | 14.6          |
| <b>Labs: Albumin – low</b>                               | 23.6                        | 1           | 2     | 66.7           | 24.2          | 44.4          | 8.4           | 46.5          | 10.0          | 4.6           |

|                                                       |      |   |   |      |      |      |      |      |      |      |
|-------------------------------------------------------|------|---|---|------|------|------|------|------|------|------|
| <b>Labs: Platelets - low</b>                          | 21.8 | 1 | 2 | 45.7 | 26.2 | 28.4 | 7.7  | 56.5 | 12.3 | 8.7  |
| <b>Home equipment or wheelchair</b>                   | 20.3 | 1 | 3 | 51.6 | 8.1  | 59.2 | 14.3 | 13.2 | 9.4  | 7.4  |
| <b>Utilization: 1+ Mental health visit</b>            | 16.7 | 1 | 5 | 25.9 | 3.7  | 7.8  | 6.7  | 7.7  | 86.5 | 2.6  |
| <b>Procedures: Psychiatric care</b>                   | 11.3 | 1 | 5 | 14.7 | 1.0  | 1.9  | 0.5  | 4.3  | 73.9 | 0.7  |
| <b>Procedures: Cancer (chemo, radiation, surgery)</b> | 7.7  | 1 | 6 | 9.1  | 1.4  | 1.5  | 4.4  | 66.8 | 2.7  | 1.3  |
| Neighborhood deprivation index: Quartile 3 or 4       | 47.9 | 0 | 0 | 50.8 | 44.6 | 42.8 | 46.2 | 42.7 | 53.1 | 51.1 |
| Body Mass Index 30+                                   | 38.1 | 0 | 0 | 39.9 | 45.2 | 21.4 | 47.7 | 24.2 | 44.9 | 37.3 |
| Utilization: 3+ ED visits not admitted to hospital    | 24.2 | 0 | 0 | 38.1 | 13.8 | 21.5 | 31.4 | 15.6 | 40.0 | 19.1 |
| Utilization: 7+ Patient Messages to PCP               | 24.0 | 0 | 1 | 35.9 | 20.8 | 19.1 | 45.5 | 25.1 | 33.1 | 9.9  |
| Medication: Anticoagulants - Not Heparin              | 21.5 | 0 | 1 | 38.4 | 49.4 | 19.4 | 15.9 | 10.1 | 7.6  | 11.5 |
| Utilization: 5+ Primary care visits                   | 20.7 | 0 | 1 | 43.5 | 23.1 | 12.2 | 35.7 | 10.8 | 26.8 | 8.3  |
| Procedures: Physical therapy                          | 18.0 | 0 | 1 | 26.6 | 10.1 | 14.3 | 46.2 | 13.4 | 22.7 | 7.5  |
| Procedures: Cardiac stress test                       | 18.6 | 0 | 2 | 31.6 | 40.6 | 4.1  | 19.9 | 21.2 | 12.5 | 8.8  |
| DME: Mobility walking                                 | 16.0 | 0 | 2 | 42.4 | 10.0 | 33.2 | 17.5 | 15.3 | 10.1 | 4.3  |
| Utilization: 2+ Social work visit                     | 20.5 | 0 | 3 | 45.4 | 6.6  | 32.7 | 6.9  | 29.1 | 51.8 | 4.9  |
| Utilization: 1+ Skilled nursing facility stay         | 10.9 | 0 | 5 | 35.3 | 0.7  | 46.1 | 1.8  | 2.0  | 2.5  | 2.1  |
| PHQ9 Depression score 10+                             | 9.7  | 0 | 5 | 14.8 | 2.4  | 3.7  | 7.4  | 3.7  | 44.8 | 2.9  |
| Labs: Neutrophils - low                               | 7.8  | 0 | 5 | 12.6 | 2.8  | 4.4  | 2.5  | 49.6 | 6.3  | 2.6  |
| Utilization: Not registered on online patient portal  | 24.9 | 0 | 0 | 23.3 | 23.7 | 32.0 | 14.1 | 13.6 | 20.5 | 33.0 |
| Medication: Insulins                                  | 18.2 | 0 | 0 | 35.3 | 24.9 | 11.6 | 17.2 | 11.5 | 13.2 | 15.7 |

|                                                      |      |   |   |      |      |      |      |      |      |      |
|------------------------------------------------------|------|---|---|------|------|------|------|------|------|------|
| Medications: <80% Possession ratio                   | 17.1 | 0 | 0 | 27.2 | 17.3 | 20.2 | 14.5 | 12.6 | 14.3 | 15.5 |
| Medical financial assistance application or coverage | 14.5 | 0 | 1 | 24.0 | 14.9 | 13.3 | 14.6 | 20.2 | 15.1 | 9.6  |
| No in-state emergency contact on file                | 17.9 | 0 | 2 | 7.2  | 9.9  | 14.0 | 13.5 | 10.8 | 30.2 | 27.2 |
| PCP assignment: 1+ Patient initiated switch          | 13.1 | 0 | 2 | 18.2 | 9.9  | 14.6 | 15.7 | 11.2 | 19.2 | 9.2  |

|                                                         |      |   |   |      |      |      |      |      |      |      |
|---------------------------------------------------------|------|---|---|------|------|------|------|------|------|------|
| Medication: Antianxiety Agents – Benzodiazepines        | 15.4 | 0 | 3 | 19.2 | 5.1  | 9.6  | 21.6 | 28.9 | 37.4 | 6.9  |
| Medication: Anti asthmatic - Steroid Inhalants          | 14.3 | 0 | 3 | 21.3 | 18.1 | 8.3  | 21.1 | 8.7  | 16.3 | 9.8  |
| Labs: Eosinophils - high                                | 11.8 | 0 | 3 | 27.4 | 10.4 | 12.7 | 8.0  | 32.0 | 7.3  | 4.9  |
| Medication: Antipsychotics or Antimanic Agents          | 11.8 | 0 | 3 | 13.3 | 0.9  | 15.4 | 2.9  | 34.4 | 36.3 | 3.4  |
| Medication: Musculoskeletal Therapy Agents              | 12.2 | 0 | 4 | 15.7 | 4.2  | 4.1  | 29.8 | 8.5  | 25.1 | 6.9  |
| DME: Oxygen                                             | 9.9  | 0 | 4 | 25.2 | 14.4 | 13.4 | 7.1  | 4.9  | 3.7  | 5.3  |
| Medication: Gout Agents                                 | 9.6  | 0 | 4 | 16.9 | 18.8 | 6.0  | 6.4  | 10.7 | 3.5  | 6.8  |
| End-stage renal disease (on registry, lab or procedure) | 8.0  | 0 | 4 | 23.0 | 12.1 | 4.4  | 2.4  | 10.4 | 1.8  | 6.7  |
| Utilization: No office or telephone visits              | 18.6 | 0 | 5 | 4.2  | 9.5  | 36.0 | 4.0  | 1.8  | 8.1  | 36.9 |
| Medication: Antianginal Agents                          | 11.8 | 0 | 5 | 27.8 | 29.5 | 7.3  | 7.3  | 2.2  | 4.3  | 5.7  |
| Medication: Platelet Aggregation Inhibitors             | 9.7  | 0 | 5 | 19.7 | 18.4 | 9.3  | 8.0  | 2.4  | 4.0  | 6.4  |
| Medications: High risk medications                      | 9.6  | 0 | 5 | 16.7 | 6.5  | 8.0  | 19.5 | 9.9  | 8.3  | 5.5  |

|                                                             |     |   |   |      |      |      |      |      |     |      |
|-------------------------------------------------------------|-----|---|---|------|------|------|------|------|-----|------|
| Procedures: Speech assessment and treatment                 | 9.0 | 0 | 5 | 28.2 | 2.9  | 31.4 | 4.2  | 4.9  | 4.2 | 0.8  |
| Procedures: Hearing assessment and treatment                | 7.7 | 0 | 5 | 10.8 | 8.7  | 5.8  | 12.3 | 8.0  | 6.8 | 5.0  |
| Utilization: No recent login to online patient portal       | 7.6 | 0 | 5 | 7.1  | 6.3  | 12.1 | 4.2  | 3.3  | 5.7 | 10.1 |
| Procedures: Lung function assessment                        | 6.3 | 0 | 5 | 11.4 | 12.0 | 0.8  | 9.2  | 9.4  | 4.5 | 2.1  |
| Labs: INR/PTT - high                                        | 5.3 | 0 | 5 | 20.1 | 10.1 | 5.0  | 1.5  | 5.9  | 1.2 | 0.5  |
| Medication: Antiarrhythmics                                 | 4.8 | 0 | 5 | 11.5 | 15.2 | 2.0  | 2.1  | 1.1  | 1.2 | 1.1  |
| Utilization: 7+ Patient calls                               | 4.5 | 0 | 5 | 11.2 | 2.6  | 0.6  | 5.6  | 11.8 | 9.3 | 0.6  |
| Procedures: Cardiovascular (major surgery, catheterization) | 3.5 | 0 | 5 | 11.8 | 11.1 | 0.4  | 1.6  | 1.2  | 1.0 | 0.2  |

|                                                         |     |   |   |      |      |     |      |      |      |     |
|---------------------------------------------------------|-----|---|---|------|------|-----|------|------|------|-----|
| Any Medicaid membership during prior year               | 8.4 | 0 | 6 | 9.9  | 3.6  | 4.6 | 8.9  | 6.1  | 20.2 | 7.7 |
| Labs: HbA1c- high (> 9%)                                | 8.3 | 0 | 6 | 13.7 | 9.4  | 5.0 | 7.1  | 4.4  | 8.2  | 8.9 |
| Medication: Antineoplastic or Adjunctive Therapies      | 7.0 | 0 | 6 | 8.3  | 3.7  | 4.1 | 6.2  | 36.8 | 3.3  | 3.7 |
| Medication: Urinary Antispasmodics                      | 6.1 | 0 | 6 | 9.1  | 3.5  | 8.0 | 11.2 | 4.0  | 6.5  | 3.8 |
| Procedures: Cardiac arrhythmia assessment and treatment | 5.6 | 0 | 6 | 9.5  | 17.0 | 3.5 | 3.0  | 1.0  | 1.8  | 2.4 |
| Medication: Bupropion                                   | 4.9 | 0 | 6 | 6.6  | 1.3  | 1.8 | 6.9  | 2.5  | 18.1 | 1.9 |
| Labs: Lipase - high                                     | 4.6 | 0 | 6 | 11.8 | 2.7  | 4.8 | 2.4  | 8.7  | 5.4  | 2.7 |
| Utilization: 4+ No shows to primary care visits         | 4.0 | 0 | 6 | 11.5 | 2.2  | 1.7 | 4.6  | 2.3  | 8.6  | 1.6 |
| Medication: Smoking Deterrents                          | 4.2 | 0 | 6 | 6.3  | 2.7  | 2.2 | 4.4  | 3.2  | 11.2 | 2.3 |

|                                                               |     |   |   |      |     |      |     |      |      |     |
|---------------------------------------------------------------|-----|---|---|------|-----|------|-----|------|------|-----|
| Labs: Potassium - critical low                                | 3.9 | 0 | 6 | 17.2 | 4.0 | 4.6  | 0.7 | 5.2  | 1.5  | 0.8 |
| Utilization: 1+ Chemical dependency visits                    | 3.6 | 0 | 6 | 3.4  | 0.2 | 0.1  | 0.5 | 2.2  | 23.4 | 0.8 |
| Medication: Antidementia                                      | 3.3 | 0 | 6 | 2.4  | 1.1 | 10.7 | 1.8 | 0.8  | 2.8  | 3.0 |
| Procedures: Echocardiography                                  | 3.1 | 0 | 6 | 12.3 | 5.7 | 3.3  | 0.6 | 1.8  | 1.3  | 0.3 |
| Medication: Immunomodulators or Suppressors                   | 3.0 | 0 | 6 | 6.0  | 2.6 | 0.3  | 1.9 | 14.7 | 1.2  | 1.4 |
| Medication: Benzodiazepines                                   | 2.6 | 0 | 6 | 3.4  | 0.6 | 1.0  | 2.9 | 1.4  | 11.4 | 0.7 |
| Procedures: Liver/GI procedures                               | 2.4 | 0 | 6 | 6.1  | 1.4 | 1.7  | 0.7 | 12.9 | 1.3  | 0.5 |
| Labs: Potassium - critical high                               | 2.1 | 0 | 6 | 10.8 | 2.5 | 1.5  | 0.3 | 1.8  | 0.3  | 0.6 |
| Utilization: 4+ No shows to behavioral health visits          | 2.0 | 0 | 6 | 1.3  | 0.0 | 0.0  | 0.0 | 0.1  | 15.5 | 0.0 |
| Medication: Growth Factors                                    | 1.9 | 0 | 6 | 3.6  | 0.8 | 0.2  | 0.0 | 16.9 | 0.1  | 0.3 |
| Medication: Hypnotics, Sedatives, Sleep Disorder Agents       | 4.8 | 0 | 7 | 7.4  | 2.4 | 4.4  | 7.2 | 8.4  | 9.4  | 1.6 |
| Medication: Pulmonary Hypertension                            | 4.6 | 0 | 7 | 4.3  | 4.8 | 0.7  | 6.2 | 5.6  | 5.9  | 4.7 |
| Procedures: Sleep assessment                                  | 4.5 | 0 | 7 | 7.8  | 6.3 | 1.9  | 6.8 | 1.8  | 6.9  | 2.0 |
| Medication: Parkinson's Agents                                | 3.9 | 0 | 7 | 6.2  | 1.6 | 6.2  | 5.8 | 1.1  | 7.8  | 1.7 |
| Social: Needs Interpreter                                     | 3.7 | 0 | 7 | 3.1  | 3.2 | 4.2  | 2.2 | 3.7  | 2.2  | 5.3 |
| Procedures: Osteoporosis assessment                           | 3.5 | 0 | 7 | 5.0  | 3.1 | 2.7  | 6.2 | 4.5  | 2.6  | 2.4 |
| Labs: Influenza - positive                                    | 3.4 | 0 | 7 | 6.6  | 3.5 | 6.0  | 2.4 | 2.8  | 2.1  | 2.2 |
| Utilization: Less than 50% of 3+ primary care visits with PCP | 3.2 | 0 | 7 | 3.4  | 2.7 | 2.0  | 4.5 | 3.1  | 4.7  | 2.6 |
| Alcohol use: Exceeds daily or weekly limit                    | 3.0 | 0 | 7 | 1.2  | 3.1 | 1.8  | 2.8 | 3.1  | 4.9  | 3.4 |
| Medication: Migraine Products                                 | 2.2 | 0 | 7 | 1.6  | 0.3 | 0.2  | 5.0 | 1.5  | 8.1  | 1.0 |



|                                                     |     |   |   |     |     |     |     |     |     |     |
|-----------------------------------------------------|-----|---|---|-----|-----|-----|-----|-----|-----|-----|
| Procedures: Major joint replacement                 | 2.1 | 0 | 7 | 4.4 | 0.1 | 5.7 | 5.8 | 0.4 | 1.1 | 0.0 |
| Medication: Antivirals                              | 2.0 | 0 | 7 | 2.9 | 0.7 | 0.1 | 1.0 | 8.6 | 2.9 | 1.5 |
| Procedure: Low ejection fraction (< 30%)            | 2.0 | 0 | 7 | 4.5 | 7.9 | 0.6 | 0.2 | 0.3 | 0.3 | 0.3 |
| Utilization: Hospice (on registry or received care) | 2.0 | 0 | 7 | 3.2 | 0.4 | 8.8 | 0.0 | 3.8 | 0.3 | 0.5 |
| Labs: PSA (prostate-specific antigen) – high        | 1.8 | 0 | 7 | 1.6 | 2.1 | 1.2 | 1.4 | 5.6 | 0.7 | 1.6 |
| Labs: LDH (lactate dehydrogenase) - high            | 1.3 | 0 | 7 | 4.8 | 0.7 | 0.5 | 0.0 | 7.0 | 0.3 | 0.1 |
| Medications: Opioids                                | 1.3 | 0 | 7 | 2.0 | 0.2 | 0.5 | 2.8 | 0.3 | 3.9 | 0.5 |
| Procedures: Nerve studies                           | 1.3 | 0 | 7 | 2.4 | 0.5 | 0.3 | 4.1 | 0.8 | 2.3 | 0.3 |
| Medications: Opioid antagonists/antidotes           | 1.1 | 0 | 7 | 0.8 | 0.0 | 0.1 | 0.6 | 0.2 | 7.0 | 0.2 |
| Procedures: Bronchoscopy                            | 1.0 | 0 | 7 | 2.5 | 0.5 | 0.3 | 1.3 | 5.0 | 0.3 | 0.1 |

**eTable 3. Relative Risk for 1-year Outcomes by Complex Patient Profile, LCA Clusters**

| <b>1-Year Outcome</b> | <b>Highest Acuity</b> | <b>Older w CVD</b> | <b>Frail Elderly</b> | <b>Chronic Pain</b> | <b>Active Cancer</b> | <b>Psych Illness</b> | <b>Less Engaged (referent)</b> |
|-----------------------|-----------------------|--------------------|----------------------|---------------------|----------------------|----------------------|--------------------------------|
| Died                  | 3.4 (3.2, 3.6)        | 1.6 (1.5, 1.8)     | 3.9 (3.7, 4.1)       | 0.6 (0.6, 0.7)      | 3.6 (3.4, 3.8)       | 0.5 (0.4, 0.6)       | 1                              |
| Admitted to hospice   | 3.2 (2.9, 3.5)        | 1.2 (1.1, 1.2)     | 5.3 (4.9, 5.7)       | 0.6 (0.5, 0.7)      | 4.9 (4.5, 5.3)       | 0.5 (0.4, 0.6)       | 1                              |
| Admitted to hospital  | 2.8 (2.7, 2.9)        | 1.8 (1.8, 1.8)     | 1.9 (1.8, 2.0)       | 1.2 (1.19, 1.3)     | 1.8 (1.76, 1.9)      | 1.3 (1.25, 1.35)     | 1                              |
| 3+ ED visits          | 2.4 (2.3, 2.5)        | 1.4 (1.3, 1.4)     | 1.4 (1.35, 1.46)     | 1.3 (1.28, 1.4)     | 1.2 (1.15, 1.3)      | 1.7 (1.6, 1.8)       | 1                              |
| 5+ PCP visits         | 2.4 (2.3, 2.6)        | 1.8 (1.7, 1.8)     | 0.8 (0.7, 0.9)       | 2.5 (2.4, 2.6)      | 0.9 (0.8, 1.0)       | 2.0 (1.9, 2.1)       | 1                              |
| No visits             | 0.7 (0.6, 0.8)        | 0.5 (0.46, 0.53)   | 2.0 (1.95, 2.1)      | 0.3 (0.28, 0.33)    | 0.6 (0.5, 0.6)       | 0.6 (0.6, 0.7)       | 1                              |
| Home health visit     | 3.6 (3.5, 3.8)        | 1.8 (1.8, 2.0)     | 3.2 (3.1, 3.3)       | 1.5 (1.4, 1.5)      | 1.2 (1.1, 1.3)       | 0.9 (0.9, 1.00)      | 1                              |
| SNF stay              | 3.2 (2.0, 3.4)        | 1.2 (1.2, 1.2)     | 3.7 (3.5, 3.9)       | 0.9 (0.9, 1.0)      | 0.7 (0.6, 0.8)       | 0.7 (0.6, 0.8)       | 1                              |
| Mental health visit   | 2.9 (2.7, 3.1)        | 0.8 (0.8, 0.9)     | 1.1 (1.0, 1.2)       | 2.0 (1.9, 2.1)      | 1.4 (1.3, 1.5)       | 9.5 (9.0, 9.9)       | 1                              |

Numbers are relative risks and 95% confidence intervals, with the Less Engaged profile as the referent. ED = Emergency Department, PCP = Primary Care Provider, SNF = Skilled Nursing Facility

**eTable 4. Relative Risk for 1-year Outcomes by Complex Patient Profile, K-means clusters**

| <b>1-Year Outcome</b> | <b>Skilled Nursing and High Acuity</b> | <b>Less Engaged Low Income</b> | <b>Pain Management</b> | <b>Complex Diabetes</b> | <b>Cancer Treatment</b> | <b>Psychiatric Illness</b> | <b>Complex with CVD</b> | <b>Less Engaged Stable (Referent)</b> |
|-----------------------|----------------------------------------|--------------------------------|------------------------|-------------------------|-------------------------|----------------------------|-------------------------|---------------------------------------|
| Died                  | 2.5<br>(2.4, 2.7)                      | 1.07<br>(1.01, 1.14)           | 0.62<br>(0.57, 0.67)   | 0.86<br>(0.80, 0.92)    | 2.8<br>(2.7, 3.0)       | 0.44<br>(0.39, 0.49)       | 1.25<br>(1.17, 1.33)    | 1                                     |
| Admitted to hospice   | 2.3<br>(2.1, 2.4)                      | 0.83<br>(0.77, 0.90)           | 0.47<br>(0.42, 0.53)   | 0.50<br>(0.45, 0.56)    | 3.1<br>(2.9, 3.3)       | 0.32<br>(0.27, 0.37)       | 0.84<br>(0.77, 0.92)    | 1                                     |
| Admitted to hospital  | 1.8<br>(1.77, 1.89)                    | 1.18<br>(1.14, 1.22)           | 1.23<br>(1.18, 1.27)   | 1.47<br>(1.42, 1.52)    | 1.52<br>(1.46, 1.59)    | 1.15<br>(1.10, 1.20)       | 1.45<br>(1.40, 1.50)    | 1                                     |
| 3+ ED visits          | 1.48<br>(1.42, 1.55)                   | 1.35<br>(1.30, 1.40)           | 1.30<br>(1.25, 1.36)   | 1.45<br>(1.39, 1.51)    | 1.12<br>(1.06, 1.18)    | 1.54<br>(1.48, 1.60)       | 1.28<br>(1.23, 1.33)    | 1                                     |
| 5+ PCP visits         | 0.92<br>(0.86, 0.99)                   | 1.32<br>(1.25, 1.39)           | 2.28<br>(2.17, 2.39)   | 1.51<br>(1.42, 1.59)    | 0.85<br>(0.78, 0.92)    | 1.71<br>(1.62, 1.81)       | 1.65<br>(1.56, 1.74)    | 1                                     |
| No visits             | 2.0<br>(1.9, 2.1)                      | 1.12<br>(1.07, 1.18)           | 0.28<br>(0.26, 0.31)   | 0.65<br>(0.61, 0.70)    | 0.56<br>(0.51, 0.61)    | 0.65<br>(0.61, 0.70)       | 0.59<br>(0.56, 0.64)    | 1                                     |
| Home health visit     | 2.54<br>(2.44, 2.64)                   | 1.11<br>(1.06, 1.16)           | 1.21<br>(1.16, 1.27)   | 1.31<br>(1.25, 1.37)    | 1.02<br>(0.96, 1.09)    | 0.74<br>(0.69, 0.79)       | 1.53<br>(1.47, 1.60)    | 1                                     |
| SNF stay              | 6.40<br>(6.05, 6.77)                   | 1.62<br>(1.52, 1.74)           | 1.11<br>(1.02, 1.20)   | 1.58<br>(1.46, 1.71)    | 1.00<br>(0.90, 1.12)    | 0.91<br>(0.83, 1.01)       | 1.54<br>(1.43, 1.66)    | 1                                     |
| Mental health visit   | 1.05<br>(0.98, 1.13)                   | 0.94<br>(0.88, 1.00)           | 1.75<br>(1.65, 1.84)   | 1.25<br>(1.17, 1.33)    | 0.97<br>(0.89, 1.05)    | 6.27<br>(6.02, 6.53)       | 0.72<br>(0.67, 0.78)    | 1                                     |

Numbers are relative risks and 95% confidence intervals, with the Less Engaged, Stable profile as the referent. ED = Emergency Department, PCP = Primary Care Provider
